# Supplementary material for: Sex differences in peripheral monoamine transmitter and related hormone levels in chronic stress mice with a depression-like phenotype
Source: PeerJ. 2022 Sep 16;10:e14014. doi: 10.7717/peerj.14014 (PMC9484450; doi:10.7717/peerj.14014)
Supplement: Supplemental Information 1 [file peerj-10-14014-s001.xlsx]

## Sheet: Open Field Test
		Open Field Test
				Control group mice	Chronic stress group mice
		Male	Horizontal activity score	172.11±24.44	138.48±16.78
		(n=30)	Standing times	37.33±6.31	23.66±4.33
		Female	Horizontal activity score	168.41±16.77	160.50±16.66
		(n=30)	Standing times	38.65±5.08	20.33±7.89

## Sheet: Sucrose Preference Test
	Sucrose Preference Test
		Control group mice		Chronic stress group mice
		0 week	8 weeks later	0 week	8 weeks later
	Male	85.79±3.74	80.74±2.35	84.52±6.40	66.00±9.05
	Female	82.90±1.37	81.89±1.47	82.47±2.08	70.73±9.05

## Sheet: 5-HT
	5-HT
		Control group mice		Chronic stress group mice
		0 week	8 weeks later	0 week	8 weeks later
	Male	868.06±99.05	857.84±96.14	838.65±72.83	493.18±50.10
	Female	838.82±87.92	846.58±61.27	833.48±66.10	606.56±51.87

## Sheet: Dopamine
			Dopamine
				Control group mice		Chronic stress group mice
				0 week	8 weeks later	0 week	8 weeks later
			Male	11.21±0.57	11.19±0.74	11.57±0.62	10.47±0.53
			Female	11.34±1.04	11.16±0.44	11.96±0.78	10.79±0.60

## Sheet: Norepinephrine
				Norepinephrine
					Control group mice		Chronic stress group mice
					0 week	8 weeks later	0 week	8 weeks later
				Male	14.57±1.83	14.23±1.59	14.37±1.38	8.79±1.65
				Female	14.01±1.60	14.48±3.02	14.62±2.39	5.97±2.24

## Sheet: Androgen
					Androgen
						Control group mice		Chronic stress group mice
						0 week	8 weeks later	0 week	8 weeks later
					Male	15.52±4.10	15.54±6.97	15.72±4.42	13.61±4.00
					Female	14.92±5.01	14.78±3.56	14.89±5.33	10.03±5.07

## Sheet: Estrogen 
					Estrogen
						Control group mice		Chronic stress group mice
						0 week	8 weeks later	0 week	8 weeks later
					Male	541.37±190.25	496.43±175.35	552.36±169.90	299.65±174.91
					Female	810.83±220.06	669.24±201.97	809.44±197.50	248.34±20.45

## Sheet: Oxytocin
					Oxytocin
						Control group mice		Chronic stress group mice
						0 week	8 weeks later	0 week	8 weeks later
					Male	77.91±10.19	67.06±10.12	76.71±11.30	51.31±9.99
					Female	86.67±8.93	79.07±9.52	84.08±7.30	59.69±5.37

## Sheet: Prolactin
					Prolactin
						Control group mice		Chronic stress group mice
						0 week	8 weeks later	0 week	8 weeks later
					Male	212.53±28.80	165.44±27.55	214.18±22.75	179.65±24.41
					Female	350.65±19.41	321.38±23.38	322.77±23.36	248.08±25.85

## Sheet: Epinephrine
						Epinephrine
							Control group mice		Chronic stress group mice
							0 week	8 weeks later	0 week	8 weeks later
						Male	16.96±0.88	16.43±1.36	16.91±1.28	21.04±4.70
						Female	16.30±2.03	16.01±2.57	16.29±2.95	19.91±4.00

[truncated: 3 more sheets: Cortisone, ACTH, TOTAL]
